# Supplementary material for: Renal Denervation Decreases Susceptibility to Arrhythmogenic Cardiac Alternans and Ventricular Arrhythmia in a Rat Model of Post-Myocardial Infarction Heart Failure
Source: PubMed Central journal article supplement — JACC Basic Transl Sci. 2017 Apr 24;2(2):184–93. doi: 10.1016/j.jacbts.2017.01.008 (PMC6113543; doi:10.1016/j.jacbts.2017.01.008), 2017-04-24
Supplement: mmc1.pdf [file mmc1.pdf]

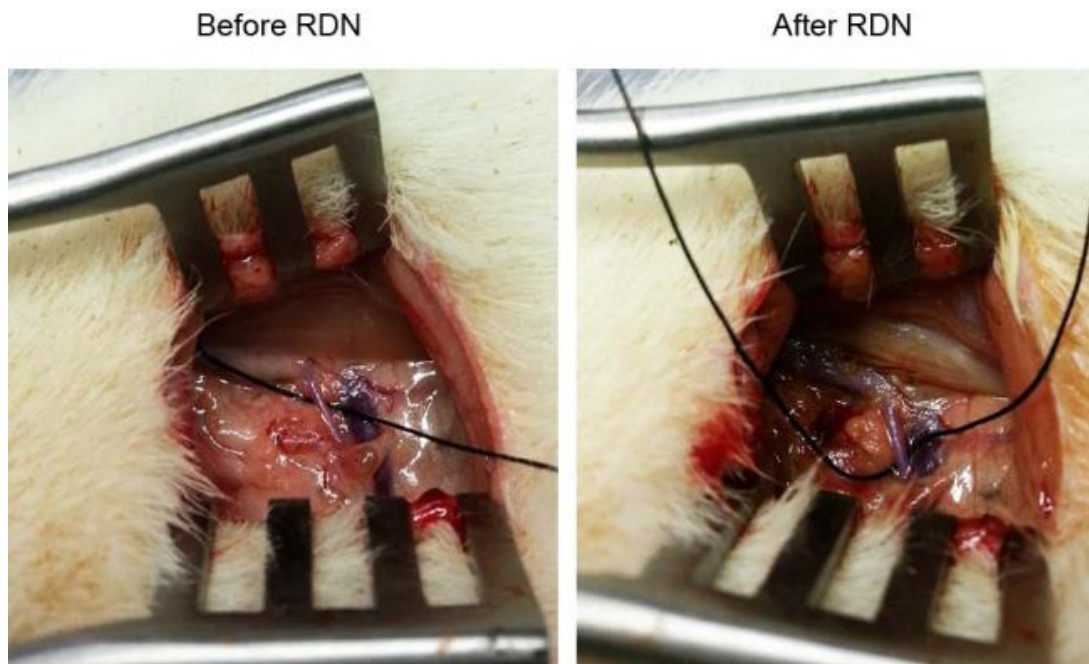

**Supplementary Figure 1.** A renal artery before and after chemical renal denervation is shown. The kidney is approached through a lateral abdominal incision. The vessel going over the black string is the exposed renal artery. The renal artery is gently painted with a cotton swab soaked with a solution of 95% ethanol and 10% phenol in ethanol. Dilatation of renal artery is noted after renal denervation.
